# Supplementary material for: KCa1.1 K+ Channel Inhibition Overcomes Resistance to Antiandrogens and Doxorubicin in a Human Prostate Cancer LNCaP Spheroid Model
Source: MDPI journal article supplement (doi:10.3390/ijms222413553), 2021-12-17
Supplement: s1 [file s1]

## Supplementary Materials

| Target name         | Genbank accession number | Primer sequence               |                              | amplicon length (bp) |
|---------------------|--------------------------|-------------------------------|------------------------------|----------------------|
|                     |                          | Forward (5' to 3')            | Reverse (5' to 3')           |                      |
| K <sub>Ca</sub> 1.1 | NM_001014797             | GCCGGGTTTCATCCATTTG           | ACCAACGGTGGACATTGTGA         | 120                  |
| KCNMB1              | NM_004137                | AGCCCTTTGCCTGGGTGTAA          | CAGGTGGCACTTGGATTCTT         | 121                  |
| KCNMB4              | NM_014505                | TCCCAGCCATTTACTTGCTATT        | AGAACGCCCACCACAAATGT         | 131                  |
| LRR26               | NM_001013653             | GCGCTGCGCCCGCTCTGCGC          | GTCGGAAAAGGCAGTCAGG          | 120                  |
| LRR38               | NM_001010847             | CAGACCTCTGCATCATCATTTTC<br>T  | CGTCTTCATCTCCGCATCT          | 130                  |
| LRR52               | NM_001005214             | ACAGGTGTGTGTGCTGTGCTCT<br>A   | CGAGCTCGTCTGGGTTTGAA         | 120                  |
| LRR55               | NM_001005210             | GTGCTGGATTTGCACAACAAC         | AACATGTCGGCTGGCACAT          | 120                  |
| FBXW7               | NM_033632                | TCACAAATGAGAGACAACATCA<br>TCA | ACAACGCACAGTGGAAGTAT<br>GC   | 120                  |
| MDM2                | NM_002392                | ATGAATCCCCCCTTCCAT            | TGAGTTTTCCAGTTTGGCTTTC<br>T  | 120                  |
| CRBN                | NM_016302                | GCCTATCGAGAGAACAGGATTT<br>T   | CACTTTAGCTTGCTGGATTCC<br>A   | 120                  |
| MDR1                | NM_001348945             | TCACCATGGATGAGATTGAGAA<br>A   | TGGCGATCCTCTGCTTCTG          | 128                  |
| MDR3                | NM_000443                | CCACAGATGCTGCCCAAGT           | GGGTAACTGCCAACCGTAGA<br>T    | 120                  |
| MRP1                | NM_004996                | AGGCGAGTGTCTCCCTCAAA          | TCCTCACGGTGATGCTGTTC         | 120                  |
| MRP2                | NM_000392                | CTCAAGAACCTGCTGGCCTTT         | ATTGTTGCTATCCACCAGGAC<br>AT  | 120                  |
| MRP3                | NM_003786                | GGCTGGGCTGATGTTCTTG           | GCCTTCCTGTAGATGACACCC<br>ATG | 123                  |
| MRP4                | NM_005845                | CTGTGCGGCTGACGGTTAC           | GGTTGCGCTGTGATATCTCAT<br>C   | 120                  |
| MRP5                | NM_005688                | CCCAGGCAACAGAGTCTAACCT        | CACCGGTTTCGGTAATTCAAT        | 120                  |
| MRP6                | NM_001171                | TTAGACGCGAGAGGTCCATCA         | CGTATTGGATGCTGTCCTTTC<br>C   | 129                  |
| ABCG1               | NM_016818                | AGGGACTCGGTCCTGACACA          | GAAGCCGGAGTTGCTCAAGA         | 120                  |
| ABCG2               | NM_004827                | CGATATGGATTTACGGCTTTGC<br>A   | CCAAATATTCTTCGCCAGTAC<br>ATG | 121                  |
| NANOG               | NM_024865                | CCTTCCTCCATGGATCTGCTTA        | CTTGACCGGGACCTTGTGTTC        | 120                  |
| KLF4                | NM_001314052             | ACGGCTGTGGATGGAAATTC          | GGTGGTCCGACCTGGAAAAT         | 120                  |
| CD44                | NM_000610                | TACAAGCACAATCCAGGCAACT        | TGGGAGTCTTCTTTGGGTGTT<br>T   | 120                  |
| AR                  | M20132                   | GCCTTGCTCTCTAGCCTCAA          | AGGAGTACTGAATGACAGCC         | 127                  |
| Nrf2                | NM_006164                | TGCCCCTGGAAGTGTCAAAC          | TCACATTGGGCATCATGCA          | 120                  |
| IL-1 $\beta$        | NM_000576                | AACGAGGCTTATGTGCACGAT         | TCCCTGGAGGTGGAGAGCTT         | 120                  |
| SKP2                | NM_005983                | AGTGAGAACATCCCCCAGGAA         | TAGCTTAGGCCTGCGGACAA         | 120                  |
| RNF6                | NM_005977                | GAGCTAACGCTTCACGCACTAA        | TTCTAGCCCCATTTTCCCAA         | 120                  |
| SIAH2               | NM_005067                | GGCTGTGGACTGGGTGATG           | GTGCCAATGAGCAGGACGAT         | 118                  |
| USP14               | NM_005151                | ATTGCAACAGAAATTGGAAGCA        | TCAACACCGAAGAACTGATCG<br>A   | 120                  |
| UBE3A               | NM_130838                | TGCTGCTTCGAAGTGCTTGA          | AGTGTGCTGCTGCTGGACTCA        | 120                  |
| NRIP                | NM_018442                | CTGTTGCTATTTGCCACCAA          | CTCGACCTGCATAATTCCCTG<br>TA  | 120                  |
| ACTB                | NM_001101                | AGGCCAACCGCGAGAAGATG          | GCCAGAGGCGTACAGGGATA         | 101                  |

Scheme S1. PCR primer information for real-time PCR.

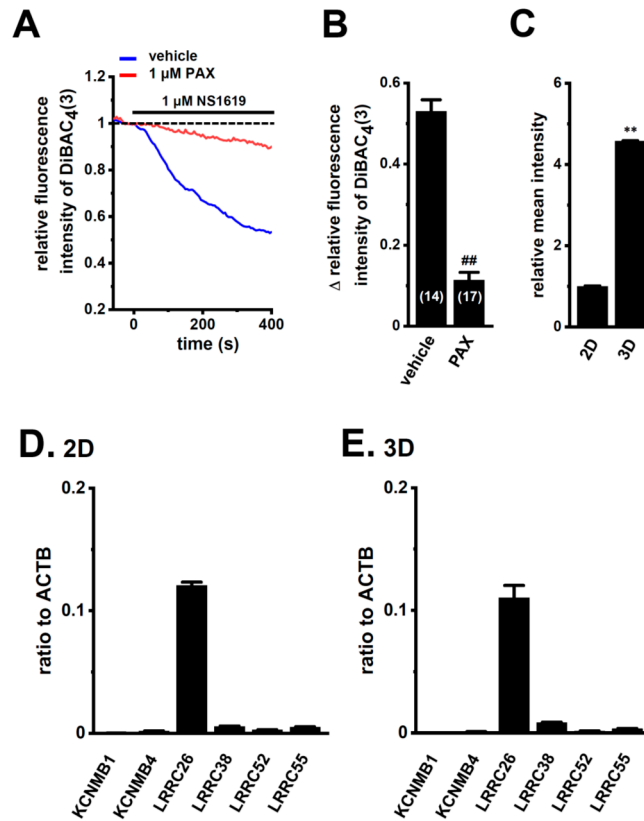

**Figure S1.** Inhibition of NS1619-induced hyperpolarizing responses by a K<sub>Ca</sub>1.1 inhibitor increased the expression level of the K<sub>Ca</sub>1.1 protein at the plasma membrane in 3D-cultured LNCaP cells and the expression of K<sub>Ca</sub>1.1 auxiliary  $\beta$  and  $\gamma$  subunits in 2D- and 3D-cultured LNCaP cells. (A): Time course of the voltage-sensitive fluorescent dye imaging of K<sub>Ca</sub>1.1 activator (1  $\mu$ M NS1619)-induced hyperpolarizing responses in isolated cells from LNCaP spheroids. Cells were pre-incubated with vehicle (blue) or PAX (1  $\mu$ M) (red) for 5 min. The fluorescent intensity of DiBAC<sub>4</sub>(3) before the application of NS1619 is expressed as 1.0. Images were measured every 5 s. (B): Summarized results of NS1619-induced hyperpolarizing responses. Cell numbers used in experiments are shown in parentheses. The values for fluorescent intensity were obtained by measuring the average for 1 min (12 images). (C): Fixed, non-permeabilized LNCaP cells were stained with an Alexa Fluor 488-conjugated anti-K<sub>Ca</sub>1.1 (extracellular) antibody, and mean fluorescence intensities were measured using flow cytometry. The intensities in '2D' were expressed as 1.0 (n = 4 for each). (D,E): Real-time PCR examination of K<sub>Ca</sub>1.1 auxiliary  $\beta$  and  $\gamma$  subunits (KCNMB1, KCNMB4, LRRC26, LRRC38, LRRC52, and LRRC55) in 2D- (D) and 3D-cultured (E) LNCaP cells (n = 4 for each). Expression levels were shown as a ratio to ACTB. \*\*:  $p < 0.01$  vs. '2D' and #:  $p < 0.01$  vs. vehicle control.

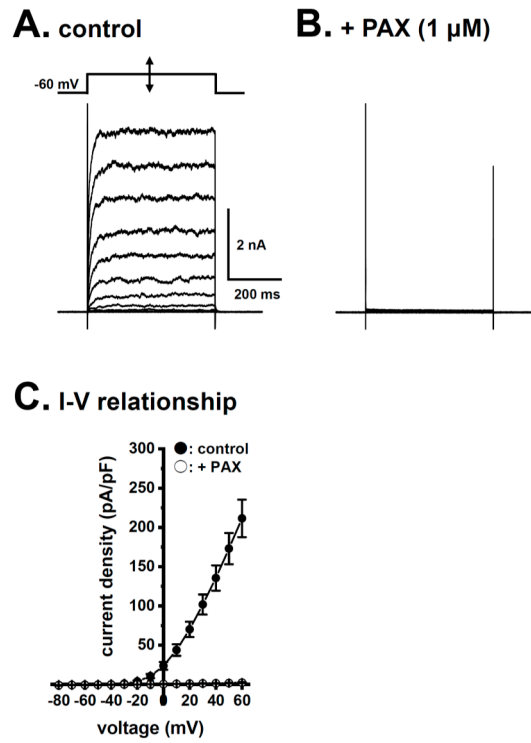

**Figure S2.** Effects of the  $K_{Ca1.1}$  inhibitor, PAX, on depolarization-induced outward  $K^+$  currents in 3D-cultured LNCaP cells. (A,B): Currents were elicited by a 500 ms depolarizing voltage step between  $-80$  and  $+60$  mV from a holding potential ( $-60$  mV) with 10-mV increments in 3D-cultured LNCaP cells (A, control). The application of  $1 \mu\text{M}$  PAX markedly reduced outward currents (B). (C): Current density-voltage relationship for outward  $K^+$  current amplitude in control ( $\bullet$ ) and PAX-treated ( $\circ$ ) groups ( $n = 8$ ).

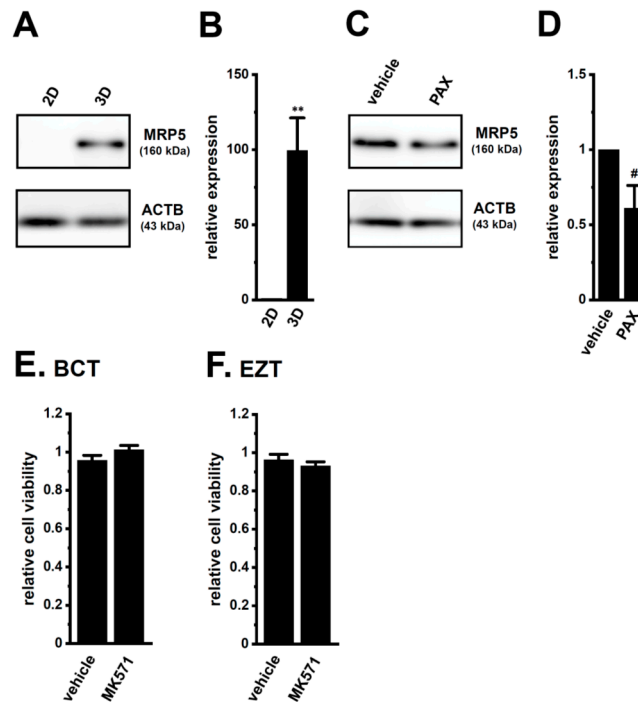

**Figure S3.** Increase in MRP5 protein expression by LNCaP spheroid formation, and its reversal by the PAX treatment in LNCaP spheroids. (A,C): MRP5 protein expression in protein lysates from the lipid-raft-enriched fractions of 2D- and 3D-cultured LNCaP cells (A) and vehicle- and PAX-treated, 3D-cultured LNCaP cells ( $n = 4$  for each) (C). Blots were probed with anti-MRP5 (approximately 160 kDa, upper panel) and anti-ACTB (43 kDa, lower panel) antibodies. (B,D): Summarized results were obtained as the optical densities of MRP5 and ACTB band signals, respectively ( $n = 4$  for each). After compensation for the optical density of the MRP5 protein band signal with that of the ACTB signal, the MRP5 signal in '2D' (B) or 'vehicle' (D) was expressed as 1.0 ( $n = 4$  for each). (E,F): Effects of the treatment with  $10 \mu\text{M}$  BCT and EZT for 48 h on the viability of vehicle- and  $10 \mu\text{M}$  MK571-cotreated LNCaP spheroids ( $n = 5$  for each). \*\*:  $p < 0.01$  vs. '2D' (B); #:  $p < 0.05$  vs. vehicle control (D).

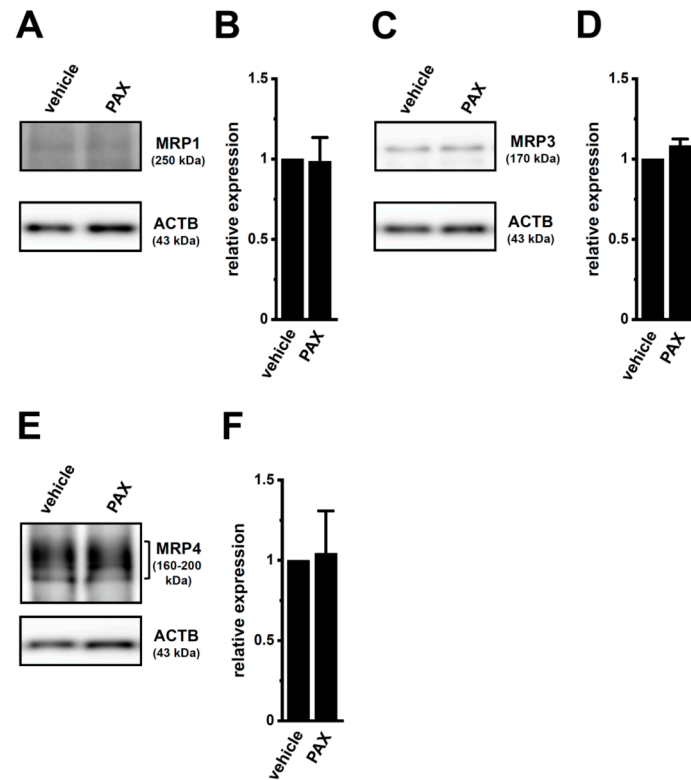

**Figure S4. No significant changes in MRP1, MRP3, and MRP4 protein expression by the PAX treatment in LNCaP spheroids.** (A,C,E): MRP1, MRP3, and MRP4 protein expression in protein lysates from the lipid-raft-enriched fractions of vehicle- and PAX-treated, 3D-cultured LNCaP cells (n = 4 for each). Blots were probed with anti-MRP1 (approximately 250 kDa, upper panel) (A), anti-MRP3 (approximately 170 kDa, upper panel) (C), anti-MRP4 (160–200 kDa, upper panel) (E), and anti-ACTB (43 kDa, lower panel) (A,C,E) antibodies. (B,D,F): Summarized results were obtained as the optical densities of MRP1, MRP3, MRP4, and ACTB band signals, respectively (n = 4 for each). After compensation for the optical density of the MRP protein band signal with that of the ACTB signal, the MRP signal in ‘vehicle’ was expressed as 1.0 (n = 4 for each).

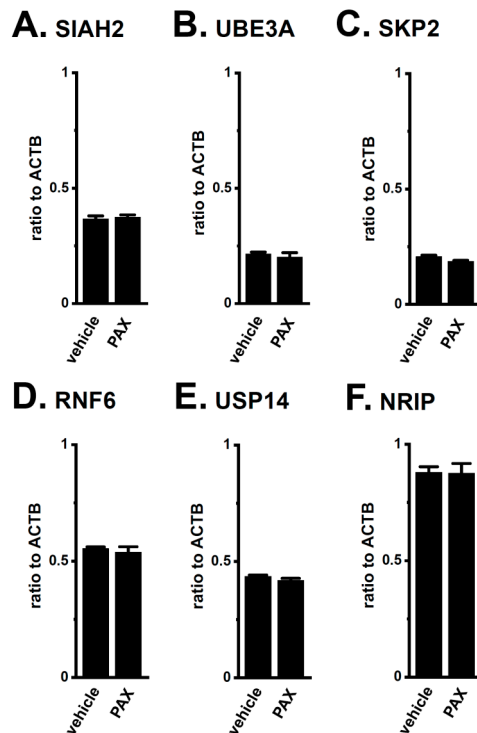

**Figure S5. Effects of the treatment with PAX for 24 h on expression levels of ubiquitin E3 ligases, SIAH2, UBE3A, SKP2, RNF6, USP14, and NRIP in LNCaP spheroids.** A-F: Real-time PCR examination of SIAH2 (A), UBE3A (B), SKP2 (C), RNF6

(D), USP14 (E), and NRIP (F) in vehicle- and 10  $\mu$ M PAX-treated, 3D-cultured LNCaP cells (for 24 h) (n = 4 for each). Expression levels were shown as a ratio to ACTB.

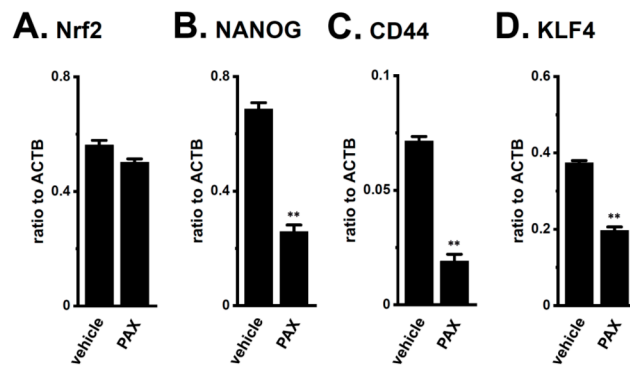

**Figure S6. Effects of the treatment with PAX on expression levels of Nrf2, NANOG, CD44, and KLF4 in LNCaP spheroids.** (A–D): Real-time PCR examination of Nrf2 (A), NANOG (B), CD44 (C), and KLF4 (D) in vehicle- and 10  $\mu$ M PAX-treated 3D-cultured LNCaP cells (for 24 h) (n = 4 for each). Expression levels were shown as a ratio to ACTB. \*\*:  $p < 0.01$  vs. vehicle control.
